# Supplementary material for: Electrochemical oxidation of H2 catalyzed by ruthenium hydride complexes bearing P2N2 ligands with pendant amines as proton relays
Source: Royal Society of Chemistry journal article supplement (doi:10.1039/c4ee01262c), 2014-01-01
Supplement: c4ee01262c1.pdf [file c4ee01262c1.pdf]

## Supplementary Information for

### Electrochemical Oxidation of H<sub>2</sub> Catalyzed by Ruthenium Hydride Complexes Bearing P<sub>2</sub>N<sub>2</sub> Ligands With Pendant Amines as Proton Relays

Tianbiao Liu,\* Mary Rakowski DuBois, Daniel L. DuBois and R. Morris Bullock\*

Center for Molecular Electrocatalysis, Physical Sciences Division, Pacific Northwest National  
Laboratory, P.O. Box 999, K2-57, Richland, WA 99352

[morris.bullock@pnl.gov](mailto:morris.bullock@pnl.gov), [tianbiao.liu@pnl.gov](mailto:tianbiao.liu@pnl.gov)

### Contents

|                                                                                                                                                                                                      |    |
|------------------------------------------------------------------------------------------------------------------------------------------------------------------------------------------------------|----|
| Figure S1. Cyclic voltammograms of 1-Cl recorded at various scan rates .....                                                                                                                         | 2  |
| Figure S2. Cyclic voltammograms of 2-Cl recorded at various scan rates .....                                                                                                                         | 3  |
| Figure S3. Cyclic voltammograms of 1-H recorded at various scan rates .....                                                                                                                          | 4  |
| Figure S4. Cyclic voltammograms of 2-H recorded at various scan rates .....                                                                                                                          | 4  |
| Figure S5. Plots of $i_{cat}/i_p$ versus DBU base concentration for 1-H and 2-H.....                                                                                                                 | 5  |
| Figure S6. Electrochemical H <sub>2</sub> oxidation by 1-H before and after saturation of the solution with H <sub>2</sub> O<br>(adding 20 $\mu$ L H <sub>2</sub> O into 1.0 mL PhF solution). ..... | 5  |
| Figure S7. Cyclic voltammograms of Cp*Ru(dmpm)Cl .....                                                                                                                                               | 6  |
| Figure S8. Cyclic voltammograms of Cp*Ru(dmpm)Cl .....                                                                                                                                               | 7  |
| Figure S9. Cyclic voltammograms of Cp*Ru(dmpm)H .....                                                                                                                                                | 7  |
| Figure S10. Attempted electrochemical H <sub>2</sub> oxidation by Cp*Ru(dmpm)H.....                                                                                                                  | 8  |
| Figure S11. Electrochemical H <sub>2</sub> oxidation by 2-H.....                                                                                                                                     | 9  |
| Calculation of thermodynamic equilibrium potential of [DBU-H] <sup>+</sup> /DBU for H <sub>2</sub> oxidation.....                                                                                    | 10 |
| Overpotential ( $\eta$ ) calculations for 1-H and 2-H.....                                                                                                                                           | 10 |

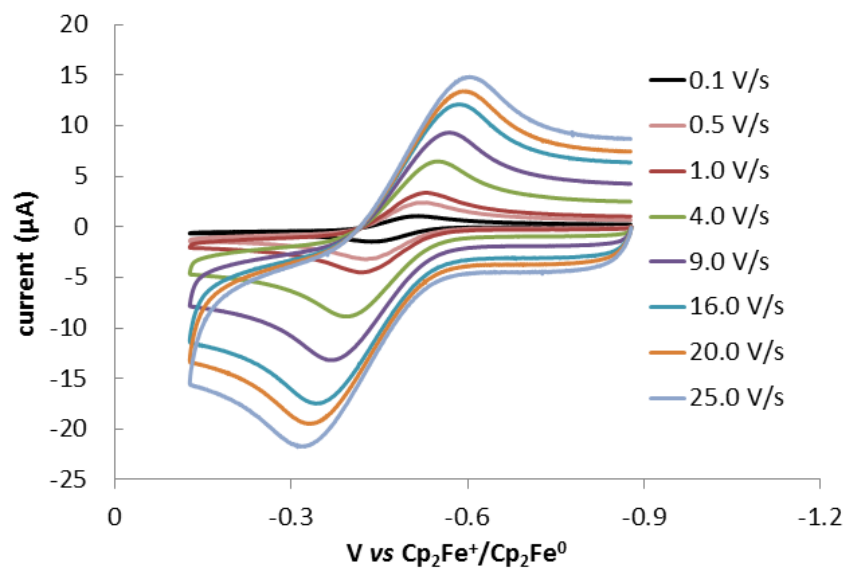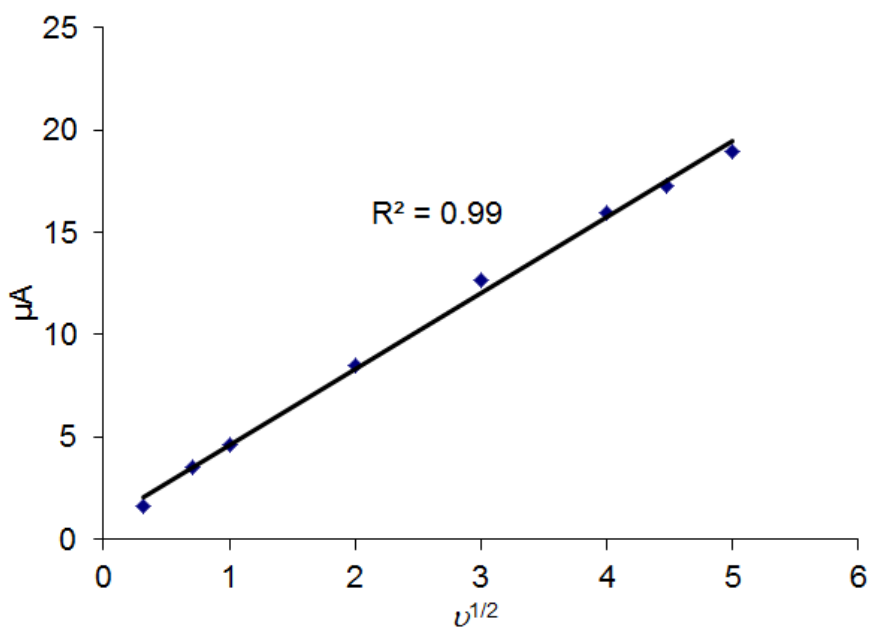

**Figure S1.** Cyclic voltammograms of **1-Cl** recorded at various scan rates (top), 0.1 - 25 V/s; electrolyte, 0.1 M  $n\text{Bu}_4\text{NB}(\text{C}_6\text{F}_5)_4$  in PhF; under Ar (1.0 atm). Plot of  $i_a$  versus the root of scan rate (bottom). A linear plot indicates the electrochemical process is under diffusion control.

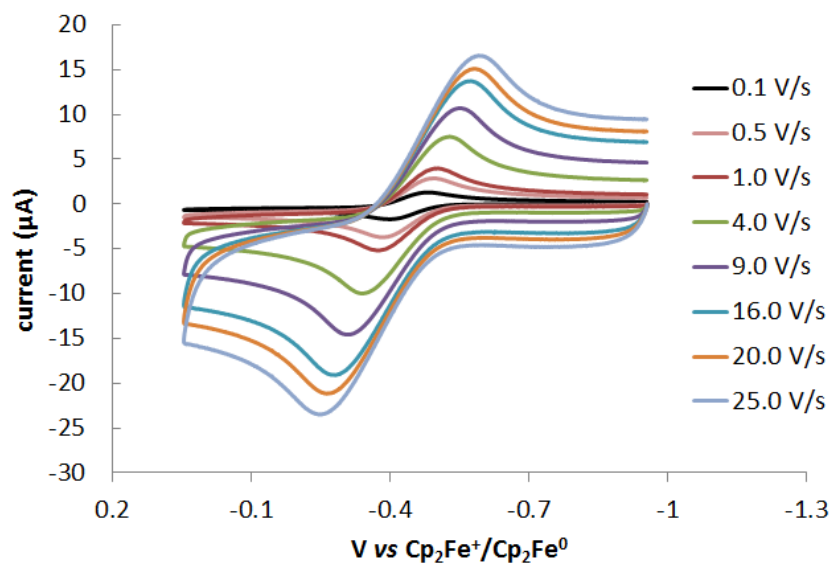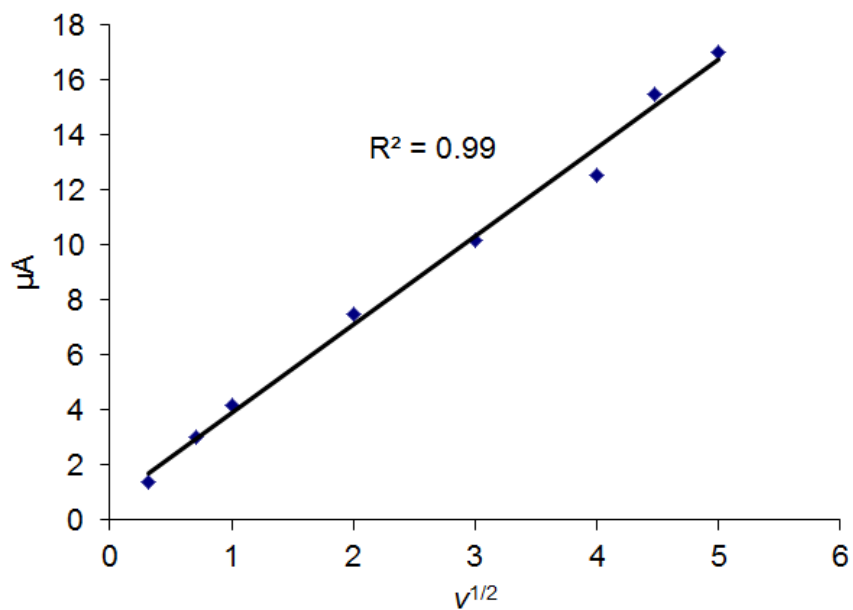

**Figure S2.** Cyclic voltammograms of **2-Cl** recorded at various scan rates (top), 0.1 - 25 V/s; electrolyte, 0.1 M  $n\text{Bu}_4\text{NB}(\text{C}_6\text{F}_5)_4$  in PhF; under Ar (1.0 atm). Plot of  $i_a$  versus the root of scan rate (bottom). A linear plot indicates the electrochemical process is under diffusion control.

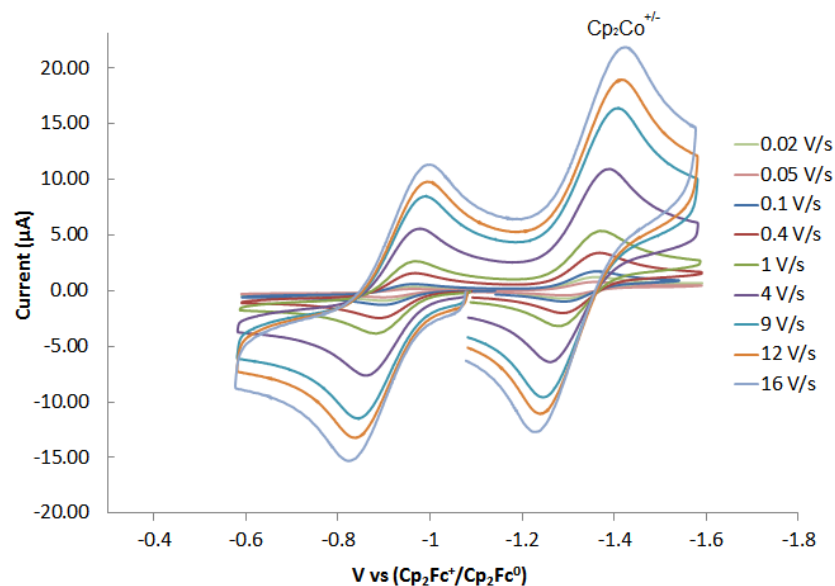

**Figure S3.** Cyclic voltammograms of **1-H** recorded at various scan rates (top), 0.1 - 16 V/s; electrolyte, 0.1 M  $n\text{Bu}_4\text{NB}(\text{C}_6\text{F}_5)_4$  in PhF; under Ar (1.0 atm);  $\text{Cp}_2\text{CoPF}_6$  (-1.33 V) as internal reference.

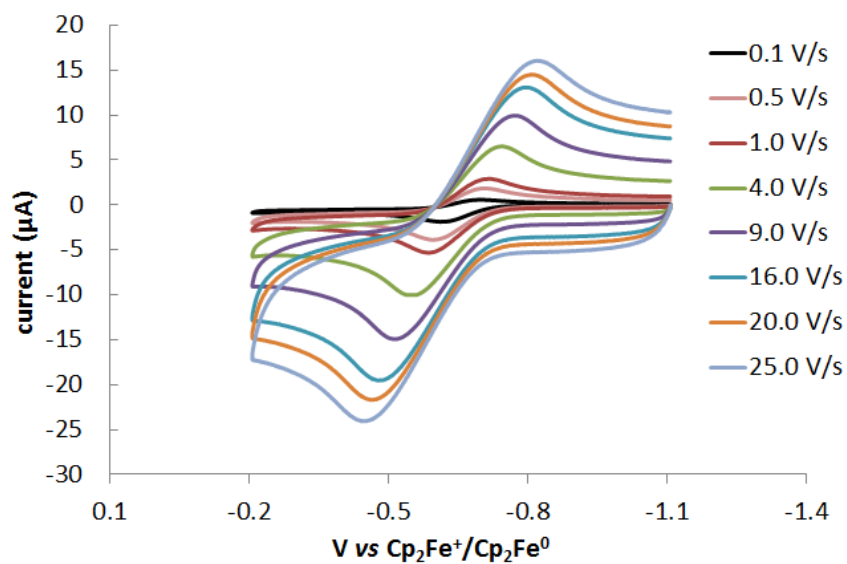

**Figure S4.** Cyclic voltammograms of **2-H** recorded at various scan rates (top), 0.1 - 16 V/s; electrolyte, 0.1 M  $n\text{Bu}_4\text{NB}(\text{C}_6\text{F}_5)_4$  in PhF; under Ar (1.0 atm).

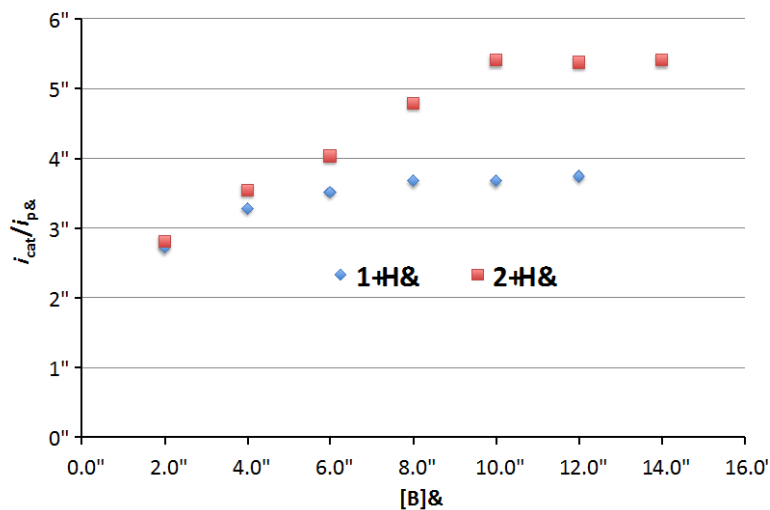

Figure S5. Plots of  $i_{cat}/i_p$  versus DBU base concentration for **1-H** and **2-H**. Conditions: 1.0 mM solution of **1-H** or **2-H** in PhF at 22 °C under 1.0 atm H<sub>2</sub> at 20 mV/s scan.

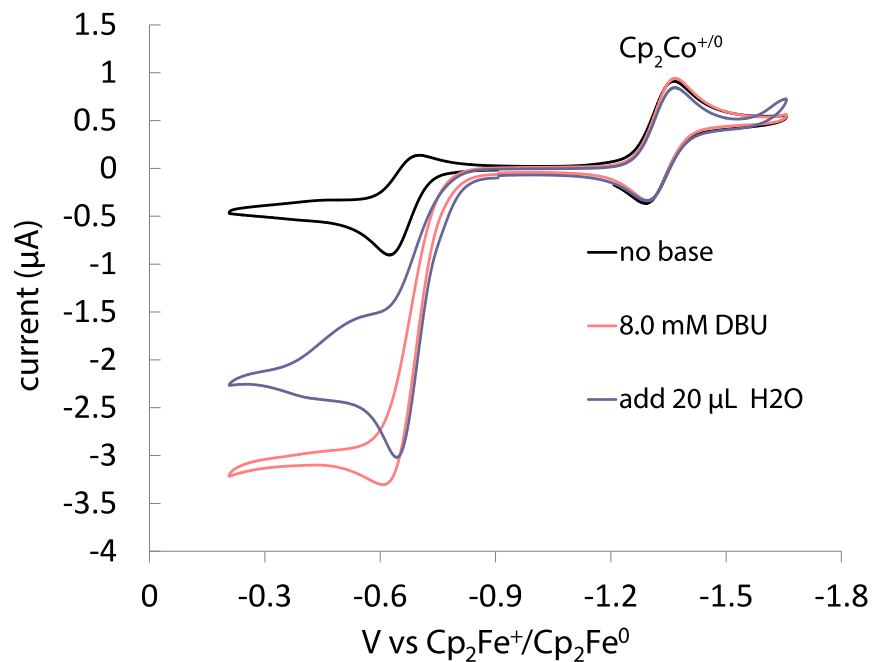

**Figure S6.** Electrochemical H<sub>2</sub> oxidation by **1-H** before and after saturation of the solution with H<sub>2</sub>O (adding 20 µL H<sub>2</sub>O into 1.0 mL PhF solution). Conditions: 1.0 mM **1-H**; 0.1 M <sup>n</sup>Bu<sub>4</sub>NB(C<sub>6</sub>F<sub>5</sub>)<sub>4</sub>; 1.0 atm H<sub>2</sub>; scan rate, 20 mV/s; 22 °C; Cp<sub>2</sub>CoPF<sub>6</sub> (-1.33 V) as internal reference.

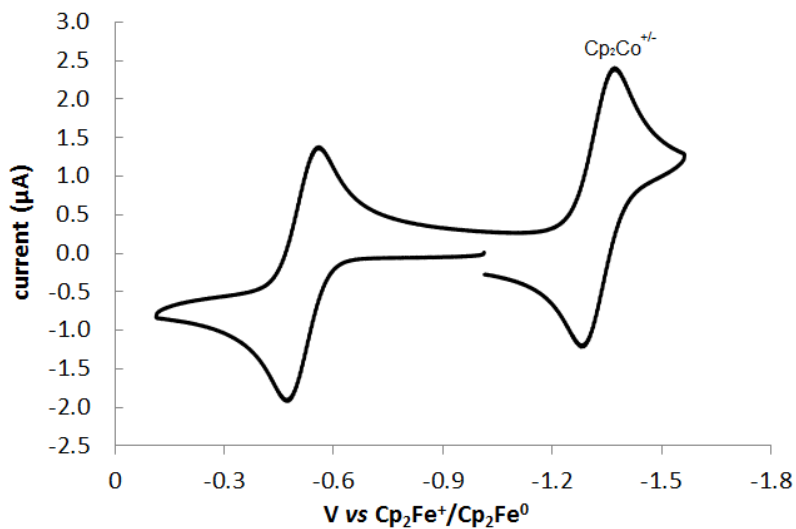

**Figure S7.** Cyclic voltammograms of Cp\*Ru(dmpm)Cl. Conditions: 1.0 mM; 0.1 M <sup>n</sup>Bu<sub>4</sub>NB(C<sub>6</sub>F<sub>5</sub>)<sub>4</sub>; under 1.0 atm Ar; scan rate, 100 mV/s; Cp<sub>2</sub>CoPF<sub>6</sub> (-1.33 V) as internal reference.

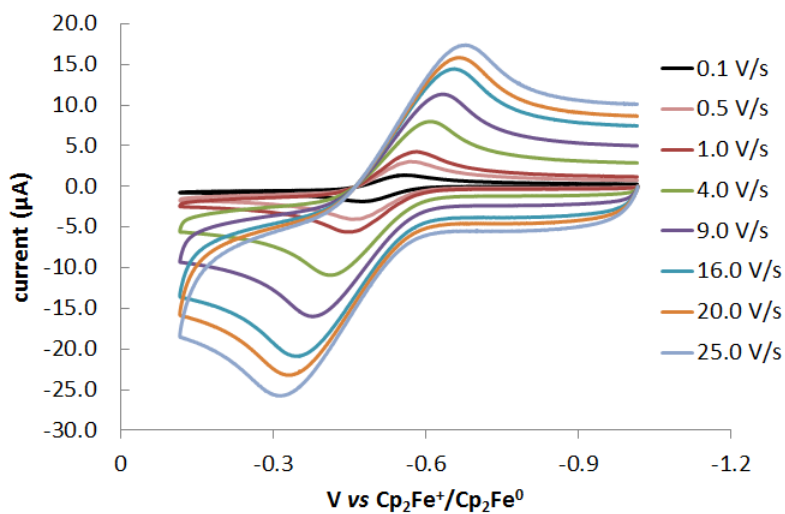

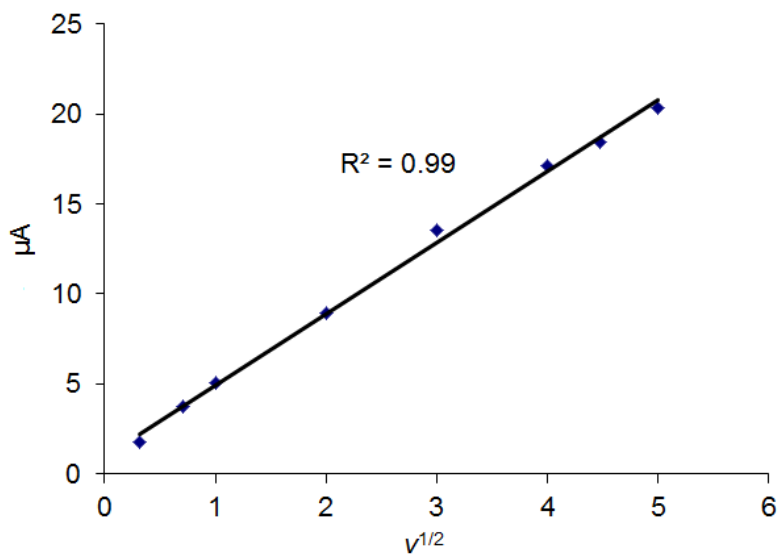

**Figure S8.** Cyclic voltammograms of Cp\*Ru(dmpm)Cl recorded at various scan rates (top), 0.1 - 25 V/s; electrolyte, 0.1 M  $n\text{Bu}_4\text{NB}(\text{C}_6\text{F}_5)_4$  in PhF; under Ar (1.0 atm). Plot of  $i_a$  versus the root of scan rate (bottom). A linear plot indicates the electrochemical process is under diffusion control.

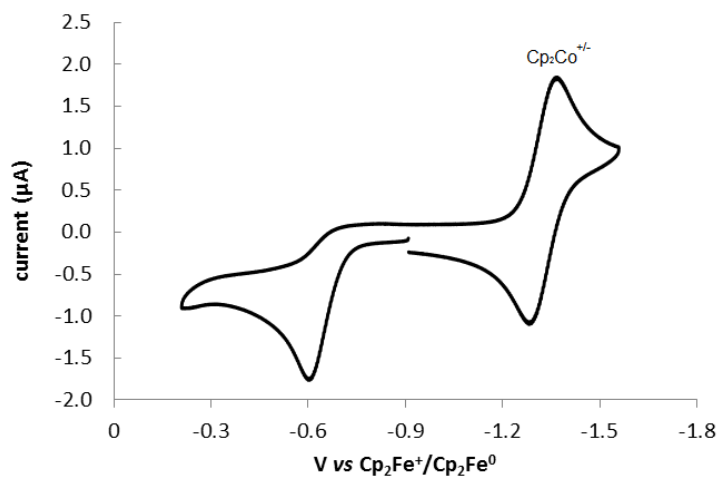

**Figure S9.** Cyclic voltammograms of Cp\*Ru(dmpm)H recorded at various scan rates (top), 0.1 - 25 V/s; electrolyte, 0.1 M  $n\text{Bu}_4\text{NB}(\text{C}_6\text{F}_5)_4$  in PhF;  $\text{Cp}_2\text{CoPF}_6$  (-1.33 V) as internal reference; under Ar (1.0 atm).

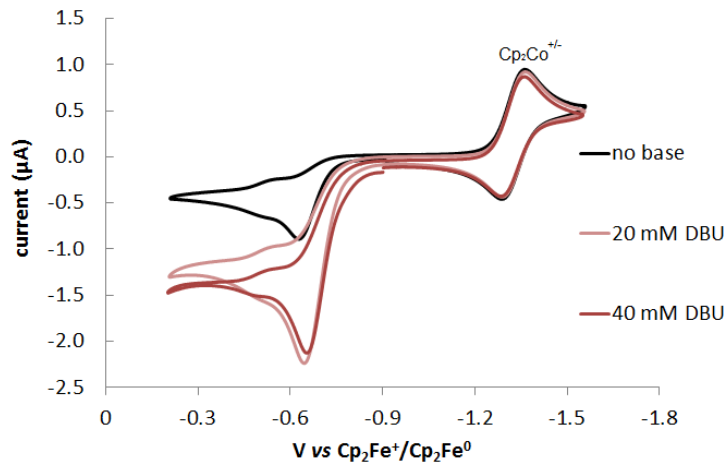

**Figure S10.** Attempted electrochemical H<sub>2</sub> oxidation by Cp<sup>\*</sup>Ru(dmpm)H under 1.0 atm H<sub>2</sub> with increasing concentrations of DBU as indicated in the legend. Conditions: 1.0 mM analyt of Ru-complexes; 0.1 M <sup>n</sup>Bu<sub>4</sub>NB(C<sub>6</sub>F<sub>5</sub>)<sub>4</sub>; 1.0 atm H<sub>2</sub>; scan rate, 20 mV/s; 22 °C; Cp<sub>2</sub>CoPF<sub>6</sub> (-1.33 V) as internal reference.

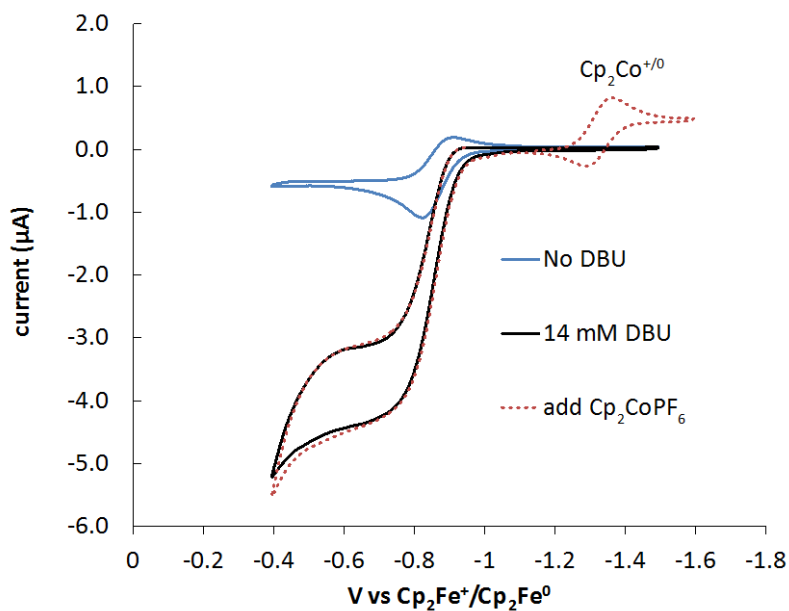



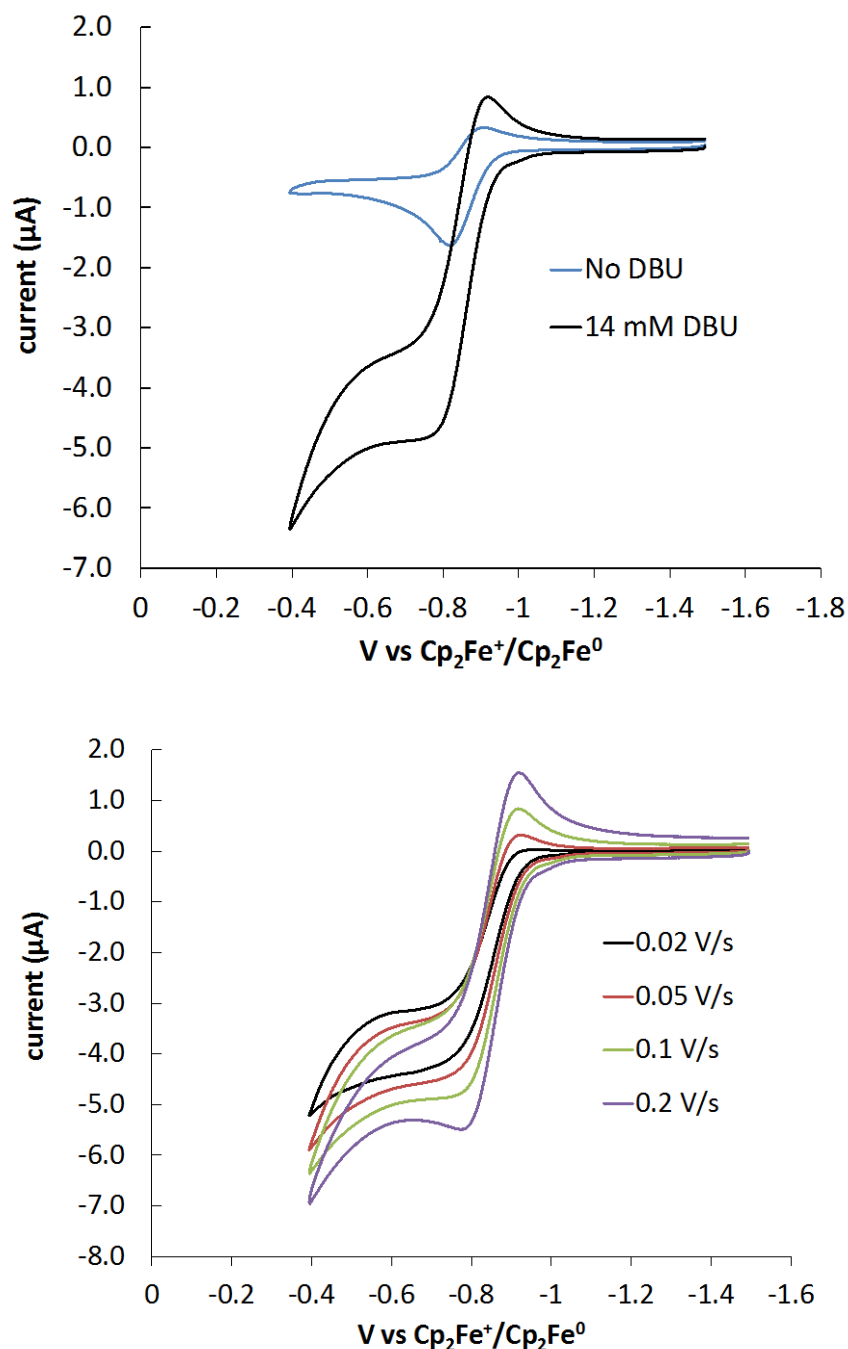

**Figure S11.** Electrochemical H<sub>2</sub> oxidation by **2-H** under 1.0 atm H<sub>2</sub> in the presence of 14 mM DBU. (top) Cyclic voltammograms recorded at 0.02 V/s: the overlapped catalytic waves (black trace and red dot trace) confirmed the presence of the internal reference, Cp<sub>2</sub>CoPF<sub>6</sub> (-1.33 V), has no influence on the catalytic current for the oxidation of H<sub>2</sub>. (middle) Cyclic voltammograms recorded at 0.1 V/s. (bottom) Cyclic voltammograms for the oxidation of H<sub>2</sub> by **2-H** recorded at 0.02 V/s, 0.05 V/s, 0.1 V/s and 0.2 V/s for a same solution under catalytic conditions (1.0 atm H<sub>2</sub>

in the presence of 14 mM DBU). Conditions: 1.0 mM **2-H**; 0.1 M <sup>n</sup>Bu<sub>4</sub>NB(C<sub>6</sub>F<sub>5</sub>)<sub>4</sub>; 1.0 atm H<sub>2</sub>; scan rate, 20 mV/s; 22 °C; Cp<sub>2</sub>CoPF<sub>6</sub> (-1.33 V) as internal reference.

### Calculation of thermodynamic equilibrium potential of [DBU-H]<sup>+</sup>/DBU for H<sub>2</sub> oxidation.

The poor solubility of [DBU-H]<sup>+</sup> precludes direct experimental measurement of the thermodynamic equilibrium potential by the open circuit potential method developed by our group.<sup>1-3</sup> Therefore, the thermodynamic equilibrium potential of [DBU-H]<sup>+</sup>/DBU was estimated.<sup>2</sup> The relationship of thermodynamic equilibrium potential for different [B-H]<sup>+</sup>/B can be expressed as equation S2.

$$E^\circ_{([B-H]^+/B)} = E^\circ_{H^+} - \left(\frac{2.303RT}{F}\right) pK_{a, ([B-H]^+)} \quad (\text{equation S1})$$

$$E^\circ_{([B'-H]^+/B')} = E^\circ_{([B-H]^+/B)} - \left(\frac{2.303RT}{F}\right) \Delta pK_a \quad (\text{equation S2})$$

Since E<sup>o</sup><sub>[Et<sub>3</sub>N-H]<sup>+</sup>/Et<sub>3</sub>N in PhF was determined as -1.01 V vs Cp<sub>2</sub>Fe<sup>+0</sup>, E<sup>o</sup><sub>[DBU-H]<sup>+</sup>/DBU in PhF can be calculated using ΔpK<sub>a</sub> ([DBU-H]<sup>+</sup> - [Et<sub>3</sub>N-H]<sup>+</sup>), 5.52, in CH<sub>3</sub>CN:</sub></sub>

$$\begin{aligned} & E^\circ_{([DBU-H]^+/DBU)} \\ &= E^\circ_{([Et_3N-H]^+/Et_3N)} - \left(\frac{2.303RT}{F}\right) \Delta pK_a = -1.31 V \end{aligned}$$

### Overpotential (η) calculations for **1-H** and **2-H**.

$$\eta = \text{Operating potential} - E^\circ_{([DBU-H]^+/DBU)} \quad (\text{equation S3})$$

The operating potential is defined as the middle point of the catalytic wave for the H<sub>2</sub> oxidation, -0.82 V and -0.85 vs Cp<sub>2</sub>Fe<sup>+0</sup> for **1-H** and **2-H** respectively.

For **1-H**,

$$\eta(DBU) = -0.71 - (-1.31) = 0.60 V$$

For **2-H**,

$$\eta(DBU) = -0.85 - (-1.31) = 0.46 V$$

### References

- (1) Pool, D. H.; Stewart, M. P.; O'Hagan, M.; Shaw, W. J.; Roberts, J. A. S.; Bullock, R. M.; DuBois, D. L. *Proc. Natl. Acad. Sci. U. S. A.* **2012**, *109*, 15634-15639.
- (2) Liu, T.; DuBois, D. L.; Bullock, R. M. *Nat. Chem.* **2013**, *5*, 228-233.
- (3) Roberts, J. A. S.; Bullock, R. M. *Inorg. Chem.* **2013**, *52*, 3823-3835.
